Anesthesiology  
1996; 84:1077-82  
© 1996 American Society of Anesthesiologists, Inc.  
Lippincott-Raven Publishers

## In Vitro $^{31}\text{P}$ -Magnetic Resonance Spectroscopy of Muscle Extracts in Malignant Hyperthermia-susceptible Patients

Jean-François Payen, M.D., Ph.D.,\* Nathalie Fouilhé, M.Sc.,† Ernest Sam-Lai, M.Sc.,† Chantal Rémy, Ph.D.,‡ Roger Dupeyre, Ph.D.,‡ Paulette Mézin, Ph.D.,§ Jane Halsall, M.B., Ch.B.,|| Paul Stieglitz, M.D.#

**Background:** It was recently suggested that malignant hyperthermia-susceptible (MHS) patients could have an elevated peak of phosphodiester in leg muscles using *in vivo* phosphorus magnetic resonance spectroscopy. In the current study, analysis of the phosphodiester of muscle extracts of MHS and malignant hyperthermia-negative patients was performed using *in vitro* phosphorus magnetic resonance spectroscopy to chemically identify and to compare the muscle concentrations of water-soluble compounds between the two groups with respect to the muscle fiber type composition.

**Methods:** Perchloric acid extracts of the *vastus medialis* muscle of seven MHS patients and ten malignant hyperthermia-negative patients on the basis of the European malignant hyperthermia contracture test were subjected to *in vitro* phosphorus magnetic resonance spectroscopy carried out at 9.4 T. In addition, chemical identification of the phosphodiester region and histologic examination of the muscle specimens were performed.

**Results:** The peak in the phosphodiester region was assigned to glycerophosphorylcholine. Muscle perchloric acid extracts

of MHS patients had a significantly ( $P < 0.05$ ) higher glycerophosphorylcholine to the sum of phosphocreatine and inorganic phosphate (glycerophosphorylcholine/[phosphocreatine + inorganic phosphate]) value than those of malignant hyperthermia-negative patients. Neither a difference in the fiber type composition between the two groups nor any specific myopathy were found.

**Conclusions:** In the absence of histologic differences between muscle specimens of MHS and malignant hyperthermia-negative patients, these results could suggest that glycerophosphorylcholine could be a marker of an impairment in the phospholipid metabolism in the skeletal muscle of MHS patients. (Key words: Hyperthermia: malignant. Measurement techniques: phosphorus magnetic resonance spectroscopy. Muscle: perchloric acid extracts.)

METABOLIC abnormalities in malignant hyperthermia-susceptible (MHS) patients have been reported in skeletal muscle using *in vivo* phosphorus magnetic resonance spectroscopy ( $^{31}\text{P}$ -MRS).<sup>1,2</sup> It was recently reported that MHS patients also exhibited a higher phosphodiester to phosphocreatine (PDE/PCr) ratio than did malignant hyperthermia-negative (MHN) patients in  $^{31}\text{P}$  spectra of gastrocnemius muscle at rest.<sup>3,4</sup> The significance of such a finding remains unknown. An increased PDE/PCr ratio also has been reported in patients with other myopathies using *in vivo*  $^{31}\text{P}$ -MRS.<sup>5,6</sup> *In vitro*  $^{31}\text{P}$ -MRS studies of the PDE compounds from normal muscle perchloric acid (PCA) extracts have identified the presence of glycerophosphorylcholine (GPC),<sup>7,8</sup> which is one water-soluble product of phospholipid catabolism.<sup>9</sup> Glycerophosphorylcholine content was increased in dystrophic chicken pectoralis muscle<sup>7</sup> as well as in slow twitch muscle containing type I fibers (e.g., in soleus muscle).<sup>8</sup>

The aim of the current *in vitro*  $^{31}\text{P}$ -MRS study was to analyze the PDE region from the muscle PCA extracts of vastus medialis of MHS and MHN patients with respect to the muscle fiber type composition. A higher GPC content in muscle PCA extracts of MHS patients could be a result of either a predominance of type I

\* Research Assistant of Anesthesiology and INSERM, The University of Grenoble School of Medicine.

† Research Assistant of INSERM, The University of Grenoble School of Medicine.

‡ Research Fellow of INSERM, The University of Grenoble School of Medicine.

§ Biologist, Cellular Pathology, The University of Grenoble School of Medicine.

|| Research Fellow, Malignant Hyperthermia Unit. The University of Leeds School of Medicine.

# Professor of Anesthesiology, The University of Grenoble School of Medicine.

Received from the Department of Anesthesia, the Department of Cellular Pathology, and INSERM U438, Albert Michallon Hospital, Grenoble, France, and the Malignant Hyperthermia Unit, St. James's University Hospital, Leeds, United Kingdom. Submitted for publication August 18, 1995. Accepted for publication January 8, 1996. Supported by a grant from the Association Française contre les Myopathies.

Address reprint requests to Dr. Payen: INSERM U438, Pavillon B, Hôpital A. Michallon, BP 217, CHU Grenoble, 38043 Grenoble Cedex 09, France.

muscle fibers or an impairment of membrane phospholipid metabolism.

## Materials and Methods

### Human Muscle Biopsy

Muscle specimens from 17 patients referred to the Grenoble MH Diagnosis Center were studied. Muscle biopsy was performed because of a family history of MH or symptoms of MH during anesthesia. Open surgical biopsies of the vastus medialis muscles were performed under regional anesthesia. One or two muscle specimens 2–2.5 cm long and weighing 440 mg (270–1067 mg) were quickly frozen and stored in liquid nitrogen until the PCA extraction procedure. Other muscle specimens were processed for histologic analysis and for the contracture test, which was performed according to the European MH Group protocol.<sup>10</sup> The test was considered positive when the muscle specimens produced a sustained increase in baseline tension with an amplitude  $\geq 0.2$  g during application of both  $\leq 2\%$  halothane and  $\leq 2$  mM caffeine. The test was equivocal when a contracture was elicited by only one test substance. Other results were deemed MH-negative.

### Perchloric Acid Extracts

The PCA extracts from muscle specimens were prepared as described previously,<sup>11</sup> within a 3-month period after biopsy. Briefly, the frozen biopsy specimen was pulverized with a liquid nitrogen-chilled mortar and pestle to a fine powder. The tissue was transferred and homogenized in a Potter-Elvehjem homogenizer with  $0.6 \text{ mol l}^{-1}$  of PCA ( $10 \text{ ml g}^{-1}$  wet weight). After centrifugation at  $41,400g$  for 10 min at  $4^\circ\text{C}$ , the pH of the supernatant was adjusted to 6.6–7.0 with potassium hydroxide. This procedure was repeated twice, and the resulting supernatant was lyophilized. The powder was then resuspended in  $\text{D}_2\text{O}$  solution (Laboratories Merck-Clévenot, Dardilly, France), centrifuged at  $12,500g$  for 10 min and the supernatant was lyophilized. All the samples obtained after this PCA extraction procedure were stored in liquid nitrogen. Before the MRS experiment, the extract was resuspended in  $350 \mu\text{l}$   $\text{D}_2\text{O}$  solution at pH 8.4 and centrifuged at  $12,500g$  for 10 min.

### <sup>31</sup>P-Magnetic Resonance Spectroscopy Study

Magnetic resonance spectroscopic experiments were performed with a Bruker AM400 spectrometer (Bruker

Spectrospin, Wissembourg, France) equipped with a 9.4-T, 89-mm diameter vertical bore magnet. The <sup>31</sup>P spectra were acquired using a 5-mm diameter multinuclear probe tuned to <sup>31</sup>P frequency (162.4 MHz) under the following conditions: single-pulse sequence of  $15.5 \mu\text{s}$  pulse length with a composite proton sequence decoupling; 4.05 s repetition time; 6 or 7 blocks of 1,600 scans; 16,384 data points per free induction decay; 6410-Hz spectral width; 3-Hz line broadening. The PCr was chosen as reference of chemical shift (0 ppm). The quantification was based on the integration of the peaks of phosphorylated compounds using UXNMR software (Bruker, Rheinstetten, Germany). Results were expressed as areas relative to the sum of PCr and inorganic phosphate (Pi) areas (PCr+Pi) or to the sum of the areas of all phosphorylated compounds visible by <sup>31</sup>P-MRS ( $\Sigma\text{P}$ ).

### Chemical Identification of the Phosphodiester Peak

The following criteria were used to identify the chemical compounds present in the PDE region: (1) the correspondence between the observed chemical shifts in the muscle PCA extracts and the known chemical shifts for pure compounds at different pH values (titration experiment), (2) the persistence of a single spectral line of enhanced intensity on addition of a standard at a final concentration of  $5 \text{ mg ml}^{-1}$  to the PCA extract at more than one pH value (coresonance experiment). The standard compounds were L- $\alpha$ -glycerophosphoryl-ethanolamine, -inositol, -serine, -choline (GPC; Sigma, Saint-Quentin Fallavier, France).

### Histologic Analysis

Sixteen muscle specimens were analyzed histologically by optical microscopy. Sections were cut on a freezing microtome and stained histochemically for myosin ATPase at pH 4.35 to perform the fiber type composition. The counting of fiber types and their mean diameters were determined using an image analyzer equipped with the Histo 200 software (Biocom, Lyon, France). The mean cross-sectional area of each muscle fiber type was then automatically calculated.

### Statistical Analysis

Data were expressed as medians and ranges. The <sup>31</sup>P-MRS and histologic parameters of MHS and MHN groups were compared using the nonparametric Mann-Whitney U test at the 0.05 level of significance.

## Results

The contracture (median 37 yr, range 23–50 yr) patients (median 23 yr) was equivocal for response to the PDE region. Figure 1 shows the PDE region of the MHS patient, before and after addition of the standard compound. The peak detected at 3.0 ppm was added to the muscle spectrum, the coincidence of the peak with the standard (coresonance experiment) was similar. The chemical shifts of the PDE peak in the muscle spectrum, the pure GPI standard, and the titration experiment were thus assigned.

Typical <sup>31</sup>P spectra from MHN and MHS

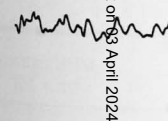

Fig. 1. A coresonance experiment before (A) and after addition of the standard compound to the diester region. The 4.05-s pulse repetition time was used. GPI = glycerophosphorylcholine.



IN VITRO  $^{31}\text{P}$ -MRS AND MALIGNANT HYPERTHERMIA

## Results

The contracture tests revealed that seven patients (median 37 yr, range 16–63) were MHS and ten patients (median 23 yr, range 12–51) MHN. None were equivocal for responses to halothane or caffeine. Figure 1 shows the PDE region in muscle PCA extract from an MHS patient, before and after sequential addition of PDE compounds. In the PDE region, a major peak was detected at 3.0 ppm. When standard compounds were added to the muscle PCA extract, there was an exact coincidence of the PDE peak only with the GPC standard (coresonance experiment). In addition, there were similar changes in the pH-dependent chemical shifts of the PDE peak of the muscle PCA extract spectrum, the pure GPC peak in  $\text{D}_2\text{O}$  solution and the GPC peak when added to the muscle PCA extracts (fig. 2; titration experiment). The major peak in PDE region was thus assigned to GPC.

Typical  $^{31}\text{P}$  spectra of muscle PCA extract obtained from MHN and MHS patients are shown in figure 3. In

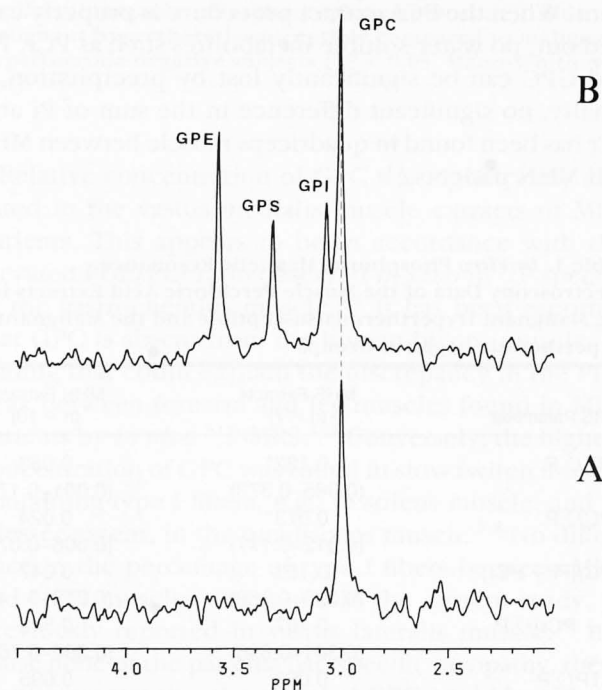

Fig. 1. A coresonance experiment from a malignant hyperthermia-susceptible muscle muscle perchloric acid extract before (A) and after (B) sequential addition of phosphodiester standard compounds to assign the resonance of the phosphodiester region. The  $^{31}\text{P}$  spectra were acquired at 9.4 T with a 4.05-s pulse repetition rate. GPE = glycerophosphorylethanolamine; GPI = glycerophosphorylinositol; GPC = glycerophosphorylcholine; GPS = glycerophosphorylserine.

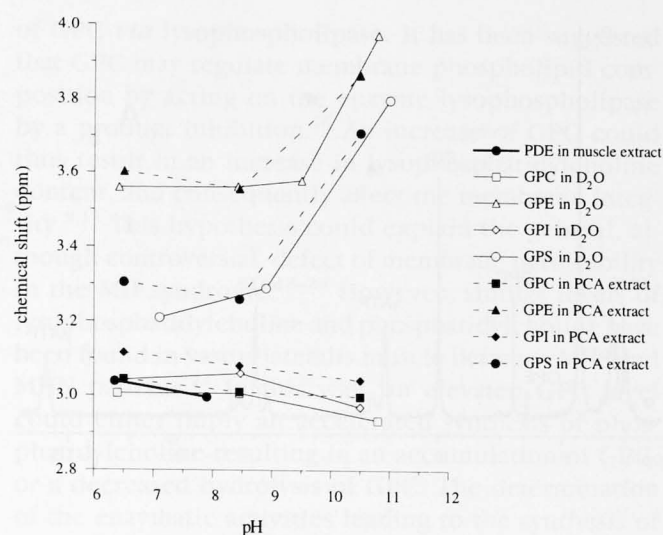

Fig. 2. A titration experiment with the determination of chemical shifts, relative to the phosphocreatine as reference, of the phosphodiester compounds at different pH values, to assign the resonance of the phosphodiester region with respect to the pH-dependent chemical shifts. The chemical shifts of the major phosphodiester peak of the muscle extract spectrum were measured as well as those of pure phosphodiester compounds peaks in  $\text{D}_2\text{O}$  solution and those when addition of phosphodiester standard compounds to the muscle perchloric acid extract.

these spectra, the GPC/(Pi+PCr) ratio was measurably higher in the muscle PCA extract of the MHS patient. For the two groups, the phosphomonoesters (PME) to  $\Sigma\text{P}$  (PME/ $\Sigma\text{P}$ ), GPC/ $\Sigma\text{P}$  and GPC/(Pi+PCr) ratios were significantly higher in MHS muscle extracts than in MHN extracts (fig. 4 and table 1). The mean of the sum of ranks was 6.3 versus 12.8 for the PME/ $\Sigma\text{P}$  ratio, 6.8 versus 12.1 for the GPC/ $\Sigma\text{P}$  ratio, and 6.7 versus 12.3 for the GPC/(Pi/PCr) ratio in the MHS and MHN groups, respectively. There was no difference between the muscle specimens of MHS and MHN patients concerning the presence of type I fibers (43% [27.9–52.8] vs. 41.4% [28.3–50.5], respectively) and the mean cross-sectional area of type I fibers ( $3,019 \mu^2$  [2206–4657] vs.  $2,734 \mu^2$  [1,257–3,217], respectively). None of the patients had specific myopathy on histologic examination of muscle specimens.

## Discussion

A significantly higher relative concentration of GPC was found in muscle PCA extracts of the MHS patients as compared to the MHN patients. In the absence of

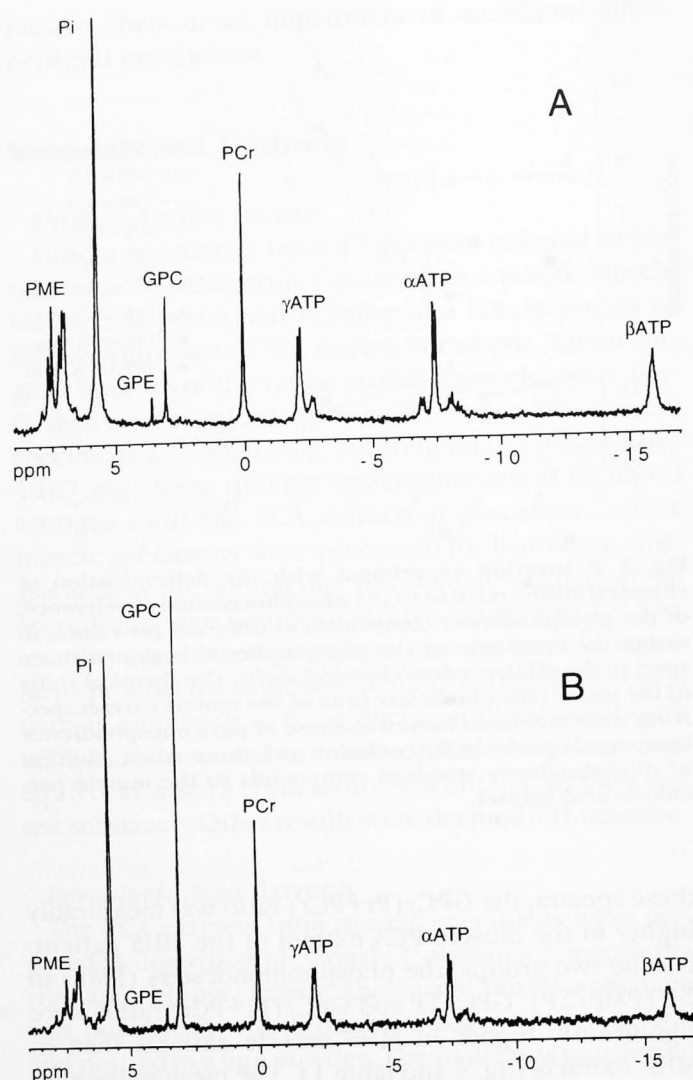

Fig. 3.  $^{31}\text{P}$ -Magnetic resonance spectroscopic spectra of muscle perchloric acid extract from malignant hyperthermia-negative patient (A) and malignant hyperthermia-susceptible patient (B). Spectra were acquired at 9.4 T in  $7 \times 1,600$  scans (A) and in  $6 \times 1,600$  scans (B) with a 4.05-s pulse repetition rate and processed with a 3-Hz exponential line broadening.

histologic differences between muscle specimens of the two groups, these results suggest that GPC could be a marker of an impairment in the phospholipid metabolism in the skeletal muscle of MHS patients. However, there was an overlap between MHS and MHN values (fig. 4), limiting diagnostic potential of these *in vitro* results.

Each phosphorus-containing chemical group has a characteristic chemical shift position, which is determined by the molecular environment of the phosphorus atom contained within different phosphorylated com-

pounds. However, ionic strength, pH, cationic, and protein concentration in cell compartments may complicate the assignment of a resonance peak recorded from intact tissue. Therefore, coresonance experiments at different pH levels are usually done to assign the resonances observed in  $^{31}\text{P}$  spectra of PCA extracts.<sup>11,12</sup> According to the PCA extract procedure, GPC was clearly identified as the primary component of the PDE peak in muscle PCA extract of MHS patients. The other PDE compounds appeared to be of minor contribution in muscle PCA extracts, as previously reported in normal muscle.<sup>8</sup> However, no absolute concentrations of GPC and other phosphorylated compounds were provided in the current study because of the absence of an external standard. In addition, the muscle specimens of different weights were resuspended in the same volume of  $\text{D}_2\text{O}$  solution, leading to different signal-to-noise ratio between PCA extracts (figs. 3A and 3B). Internal references were thus chosen such as  $\Sigma\text{P}$  and  $\text{Pi} + \text{PCr}$ , because there is a stoichiometric change between the decrease in the PCr peak intensity and the increase in the Pi peak intensity, so the sum  $\text{Pi} + \text{PCr}$  remains constant. When the PCA extract procedure is properly carried out, no water-soluble metabolites such as PCr, Pi, and GPC can be significantly lost by precipitation.<sup>13</sup> Finally, no significant difference in the sum of Pi and PCr has been found in quadriceps muscle between MHS and MHN patients.<sup>14</sup>

Table 1. *In Vitro* Phosphorus Magnetic Resonance Spectroscopy Data of the Muscle Perchloric Acid Extracts in the Malignant Hyperthermia-susceptible and the Malignant Hyperthermia-negative Groups

| MRS Parameter                    | MHS Extracts<br>(n = 7) | MHN Extracts<br>(n = 10) |
|----------------------------------|-------------------------|--------------------------|
| PME/ $\Sigma\text{P}$            | 0.132*<br>(0.065–0.373) | 0.053<br>(0.001–0.172)   |
| GPC/ $\Sigma\text{P}$            | 0.073*<br>(0.012–0.177) | 0.024<br>(0.006–0.072)   |
| GPC/(Pi + PCr)                   | 0.163*<br>(0.026–0.360) | 0.047<br>(0.013–0.145)   |
| (Pi + PCr)/ $\Sigma\text{P}$     | 0.467<br>(0.301–0.696)  | 0.542<br>(0.360–0.763)   |
| $\beta\text{ATP}/\Sigma\text{P}$ | 0.063<br>(0.023–0.124)  | 0.095<br>(0.018–0.153)   |

Values are median (ranges).

MRS = magnetic resonance spectroscopy; MHS = malignant hyperthermia-susceptible; MHN = malignant hyperthermia-negative; PME = phosphomonoesters; GPC = glycerophosphorylcholine; Pi = inorganic phosphate; PCr = phosphocreatine;  $\Sigma\text{P}$  = sum of all phosphorylated compounds.

\* Significantly different from MHN extracts ( $P < 0.05$ ) by Mann-Whitney test.

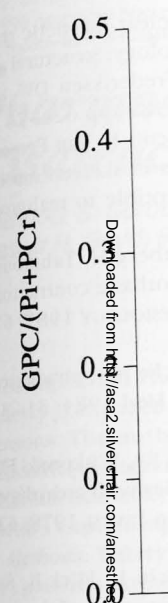

Fig. 4. Distribution of the ratio GPC/(Pi+PCr) in malignant hyperthermia-susceptible (MHS) and malignant hyperthermia-negative (MHN) patients. The line groups. There is no significant difference between the two groups (Mann-Whitney test).

Relative concentrations of GPC and Pi+PCr in the two groups. This ratio is elevated in MHS patients. The ratio of the glycerophosphorylcholine (GPC) to the sum of inorganic phosphate (Pi) and phosphocreatine (PCr) is a marker of an impairment in the phospholipid metabolism in the skeletal muscle of MHS patients. This ratio is elevated in MHS patients by *in vitro* results suggesting that GPC could be a marker of an impairment in the phospholipid metabolism in the skeletal muscle of MHS patients. This ratio is elevated in MHS patients by *in vitro* results suggesting that GPC could be a marker of an impairment in the phospholipid metabolism in the skeletal muscle of MHS patients.



IN VITRO  $^{31}\text{P}$ -MRS AND MALIGNANT HYPERTHERMIA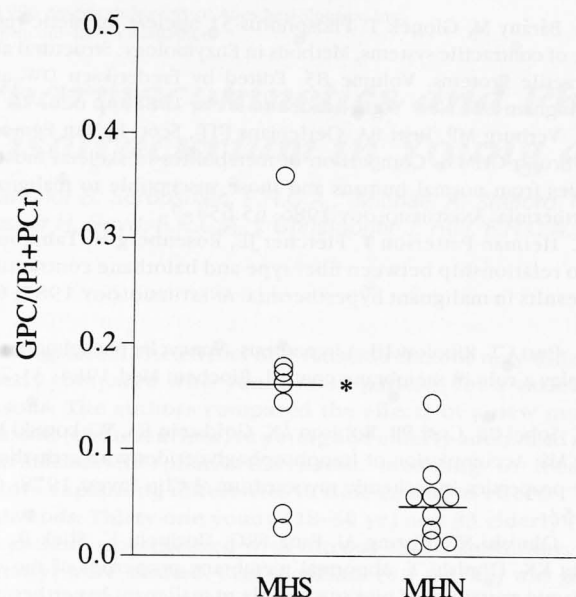

Fig. 4. Distribution of the glycerophosphorylcholine/(inorganic phosphate+phosphocreatine) ratios for malignant hyperthermia-susceptible and malignant hyperthermia-negative patients. The lines represent the median values for the two groups. There is a significantly higher glycerophosphorylcholine/(inorganic phosphate+phosphocreatine) ratio in malignant hyperthermia-susceptible compared to malignant hyperthermia-negative subjects (\* $P < 0.05$ , Mann-Whitney  $U$  test).

Relative concentration of GPC was significantly elevated in the vastus medialis muscle extracts of MHS patients. This appears to be in accordance with the elevated PDE/PCr ratio observed *in vivo* in  $^{31}\text{P}$  spectra of the gastrocnemius muscle.<sup>3,4</sup> It has been reported that GPC is absent from the human biceps muscle,<sup>7</sup> a finding that could explain the discrepancy in the PDE peak between forearm and leg muscles found in MHS patients by *in vivo*  $^{31}\text{P}$ -MRS.<sup>1-4</sup> Conversely, the highest concentration of GPC was found in slow twitch muscle containing type I fibers, e.g., in soleus muscle, and to a lesser extent, in the quadriceps muscle.<sup>7,8</sup> No difference in the percentage of type I fibers between MHS and MHN muscles was found in the current study, as previously reported in vastus lateralis muscle.<sup>15</sup> Because none of the patients had specific myopathy, these results suggest that the elevated GPC could be related to the MH susceptibility.

Glycerophosphorylcholine is a water-soluble metabolite produced by the catabolism of the membrane phospholipids, from the pathway of the phosphatidylcholine deacylation: production of lysophosphatidylcholine *via* phospholipase  $A_2$ , followed by production

of GPC *via* lysophospholipase. It has been suggested that GPC may regulate membrane phospholipid composition by acting on the enzyme lysophospholipase by a product inhibition.<sup>16</sup> An increase of GPC could thus result in an increase in lysophosphatidylcholine content, and consequently affect the membrane integrity.<sup>9,17</sup> This hypothesis could explain the general, although controversial, defect of membrane permeability in the MH syndrome.<sup>18-20</sup> However, similar levels of lysophosphatidylcholine and phosphatidylcholine have been found in vastus lateralis muscle between MHS and MHN patients.<sup>21</sup> In this way, an elevated GPC level could either imply an accelerated synthesis of phosphatidylcholine resulting in an accumulation of GPC, or a decreased hydrolysis of GPC. The determination of the enzymatic activities leading to the synthesis of phosphatidylcholine as well as to the degradation of GPC would thus be useful to elucidate the mechanisms that could account for the data.

The PME/ $\Sigma\text{P}$  ratio was higher in the muscle PCA extracts of MHS patients than those of MHN patients. The phosphomonoesters include a number of compounds such as triose phosphates, hexose aliphatic phosphates, pentose phosphates, inosine and adenosine monophosphate, choline, and phosphoethanolamine.<sup>12</sup> However, no chemical identification of the PME region was performed in the current study and the significance of such results remains unknown.

These *in vitro*  $^{31}\text{P}$ -MRS results demonstrate that the skeletal muscle of MHS patients exhibits a higher relative GPC content than that of MHN patients. Because this difference cannot be explained by histologic changes between MHS and MHN muscle specimens, these results suggest that GPC could be a marker of an impairment in the phospholipid metabolism in the skeletal muscle of MHS patients.

The authors thank J. Viret, the Department of Biophysics of The Military Health Research Center of Grenoble, for magnetic resonance spectroscopy facilities. They also thank Raphaël Massarelli and Simon Doran, for their comments.

## References

1. Olgin J, Argov Z, Rosenberg H, Tuchler M, Chance B: Non-invasive evaluation of malignant hyperthermia susceptibility with phosphorus nuclear magnetic resonance spectroscopy. *ANESTHESIOLOGY* 1988; 68:507-13
2. Olgin J, Rosenberg H, Allen G, Seestedt R, Chance B: A blinded comparison of noninvasive, *in vivo* phosphorus nuclear magnetic resonance spectroscopy and the *in vitro* halothane/cafeine contrac-

ture test in the evaluation of malignant hyperthermia susceptibility. *Anesth Analg* 1991; 72:36-47

3. Payen JF, Bourdon L, Mézin P, Jacquot C, Le Bas JF, Stieglitz P, Benabid AL: Susceptibility to malignant hyperthermia detected non-invasively (letter). *Lancet* 1991; 337:1550-1

4. Payen JF, Bosson JL, Bourdon L, Jacquot C, Le Bas JF, Stieglitz P, Benabid AL: Improved noninvasive diagnostic testing for malignant hyperthermia susceptibility from a combination of metabolites determined *in vivo* with  $^{31}\text{P}$ -magnetic resonance spectroscopy. *ANESTHESIOLOGY* 1993; 78:848-55

5. Newman RJ, Bore PJ, Chan L, Gadian DG, Styles P, Taylor D, Radda GK: Nuclear magnetic resonance studies of forearm in Duchenne dystrophy. *Br Med J* 1982; 284:1072-4

6. Bárány M, Siegel IM, Venkatasubramanian PN, Mok E, Wilbur AC: Human leg neuromuscular diseases: P-31 MR spectroscopy. *Radiology* 1989; 172:503-8

7. Chalovich JM, Burt CT, Danon MJ, Glonek T, Bárány M: Phosphodiesterases in muscular dystrophies. *Ann NY Acad Sci* 1979; 317:649-68

8. Burt CT, Glonek T, Bárány M: Phosphorus-31 nuclear magnetic resonance detection of unexpected phosphodiesterases in muscle. *Biochemistry* 1976; 15:4850-3

9. Van den Bosch H: Phosphoglyceride metabolism. *Ann Rev Biochem* 1974; 43:243-77

10. European Malignant Hyperpyrexia Group: A protocol for the investigation of malignant hyperpyrexia (MH) susceptibility. *Br J Anaesth* 1984; 56:1267-9

11. Rémy C, Arús C, Ziegler A, Sam Lai E, Moreno A, Le Fur Y, Décorps M: *In vivo*, *ex vivo* and *in vitro* one- and two-dimensional nuclear magnetic resonance spectroscopy of an intracerebral glioma in rat brain: Assignment of resonances. *J Neurochem* 1994; 62:166-79

12. Glonek T, Kopp SJ, Kot E, Pettegrew JW, Harrison WH, Cohen MM: P-31 nuclear magnetic resonance analysis of brain: The perchloric acid extract spectrum. *J Neurochem* 1982; 39:1210-9

13. Bárány M, Glonek T: Phosphorus-31 nuclear magnetic resonance of contractile systems, *Methods in Enzymology: Structural and Contractile Proteins*. Volume 85. Edited by Frederiksen DW and Cunningham LW, New York, Academic Press, 1982, pp 624-76

14. Verburg MP, Britt BA, Oerlemans FJJ, Scott B, Van Egmond J, De Bruijn CHMM: Comparison of metabolites in skeletal muscle biopsies from normal humans and those susceptible to malignant hyperthermia. *ANESTHESIOLOGY* 1986; 65:654-7

15. Heiman-Patterson T, Fletcher JE, Rosenberg H, Tahmouch AJ: No relationship between fiber type and halothane contracture test results in malignant hyperthermia. *ANESTHESIOLOGY* 1987; 67:82-4

16. Burt CT, Ribolow HJ: A hypothesis: Noncyclic phosphodiesterases may play a role in membrane control. *Biochem Med* 1984; 31:21-30

17. Sobel BE, Corr PB, Robison AK, Goldstein RA, Witkowski FX, Klein MS: Accumulation of lysophosphoglycerides with arrhythmogenic properties in ischemic myocardium. *J Clin Invest* 1978; 62:546-53

18. Ohnishi ST, Waring AJ, Fang SRG, Horiuchi K, Flick JL, Sadaana KK, Ohnishi T: Abnormal membrane properties of the sarcoplasmic reticulum of pigs susceptible to malignant hyperthermia: Modes of action of halothane, caffeine, dantrolene, and two other drugs. *Arch Biochem Biophys* 1986; 247:294-301

19. Ervasti JM, Mickelson JR, Lewis SM, Thomas DD, Louis CF: An electron paramagnetic resonance study of skeletal muscle membrane fluidity in malignant hyperthermia. *Biochim Biophys Acta* 1989; 986:70-4

20. Rock E, Mammars MS, Vignon X, Thomas MA, Viret J: Abnormal fluidity state in membranes of malignant hyperthermia pig skeletal muscle. *Arch Biochem Biophys* 1990; 281:36-40

21. Fletcher JE, Rosenberg H, Michaux K, Tripolitis L, Lizzo FH: Triglycerides, not phospholipids, are the source of elevated free fatty acids in muscle from patients susceptible to malignant hyperthermia. *Eur J Anaesth* 1989; 6:355-62
